# Supplementary material for: Therapeutic Potential of Fucoidan from a Persian Gulf Alga (Sargassum tenerrimum) in Rheumatoid Arthritis: In Vivo Evaluation in a Rat Model
Source: Research Square preprint supplement (doi:10.21203/rs.3.rs-7981987/v1), 2025-11-12
Supplement: Supplementary file 1 [file 8a8c9220710bd8c587003f3d.docx]

**Highlights**

- Persian Gulf *S. tenerrimum* fucoidan showed strong antioxidant effects.
- In RA rats, fucoidan (50–150 mg/kg) cut joint inflammation, improved symptoms, and protected cartilage, with 150 mg/kg working best.
- Joint tissue showed less IL 1β and TNF α, matching lower inflammation markers (CRP, MPO, NO, MDA).
- Fucoidan lowered pro-inflammatory factors (T-bet, RORγt) and increased immune-regulating factors (GATA3, FOXP3).
- Fucoidan boosted Nrf2 and HO 1, adding antioxidant defense alongside immune effects, unlike prednisolone.
